# Supplementary material
Source: PubMed Central journal article supplement (PMC3517181)

# PROTEOMICS

## Supporting Information for Proteomics

**DOI 10.1002/pmic.201000486**

Barbara Seliger, Sven P. Dressler, Chiara Massa, Christian V.  
Recktenwald, Florian Altenberend, Juergen Bukur,  
Francesco M. Marincola, Ena Wang, Stefan Stevanovic and  
Rudolf Lichtenfels

**Identification and characterization of human leukocyte antigen class I ligands  
in renal cell carcinoma cells**

| peptide    | RT [min] | Rtcalc. | (M+H) <sup>+</sup><br>calc. | (M+2H) <sup>2+</sup><br>calc. | (M+2H) <sup>2+</sup><br>obs. | ΔM   |
|------------|----------|---------|-----------------------------|-------------------------------|------------------------------|------|
| VPATDRNAL  | 23.1     | 20.2    | 956.5084                    | 478.7542                      | 478.77                       | 0.02 |
| ALADGVQKV  | 27.8     | 13.9    | 900.5073                    | 450.7537                      | 450.74                       | 0.01 |
| VEVGRVAYV  | 29.5     | 15.3    | 991.5497                    | 496.2749                      | 496.26                       | 0.01 |
| NTDSPLRY   | 31.6     | 21.6    | 965.4611                    | 483.2306                      | 483.24                       | 0.01 |
| KEFDGKSLV  | 31.6     | 12.8    | 1022.544                    | 511.7721                      | 511.77                       | 0.00 |
| RPELVRPAL  | 39.3     | 29.2    | 1050.634                    | 525.8172                      | 525.79                       | 0.03 |
| RVMAPRALL  | 45.7     | 35.7    | 1026.617                    | 513.8083                      | 513.77                       | 0.04 |
| RPQKVCNFL  | 46.5     | 25.6    | 1077.58                     | 539.2899                      | 539.31                       | 0.02 |
| TEITHAVVI  | 49.0     | 32.9    | 982.5492                    | 491.7746                      | 491.75                       | 0.02 |
| AGLPRPDLSL | 51.3     | 40.9    | 1038.587                    | 519.7933                      | 519.78                       | 0.01 |
| TAHLMVVVL  | 53.7     | 45.7    | 982.5679                    | 491.7840                      | 491.75                       | 0.03 |
| LTYEALGLCP | 54.7     | 43.9    | 1079.537                    | 540.2683                      | 540.29                       | 0.00 |
| FPNIPGKSL  | 59.4     | 49.2    | 972.5436                    | 486.7718                      | 468.75                       | 0.02 |
| GEHTLLVTV  | 63.0     | 28.9    | 968.5335                    | 484.7668                      | 484.77                       | 0.00 |
| LPKQPPLAL  | 64.1     | 54.7    | 976.6112                    | 488.8056                      | 488.80                       | 0.01 |
| REAPSPMLI  | 66.5     | 35.6    | 1013.537                    | 507.2687                      | 507.25                       | 0.02 |
| GEYPKLLRL  | 68.6     | 38.3    | 1088.639                    | 544.8193                      | 544.83                       | 0.01 |
| SIFEVWVAI  | 69.6     | 57.4    | 1063.575                    | 532.2874                      | 532.29                       | 0.01 |
| MPRGVVVTL  | 69.7     | 38.0    | 971.5631                    | 486.2816                      | 486.28                       | 0.00 |
| LVLMVLYLI  | 70.6     | 80.2    | 1076.671                    | 538.8356                      | 538.79                       | 0.05 |
| IYAHGALPII | 70.7     | 68.2    | 1067.617                    | 534.3086                      | 534.31                       | 0.00 |
| APRAVFPSI  | 71.9     | 43.1    | 957.5441                    | 479.2721                      | 479.26                       | 0.01 |
| REANLQALI  | 73.2     | 22.0    | 1027.582                    | 514.2910                      | 514.25                       | 0.04 |
| RIGSGLKALL | 75.3     | 35.8    | 1027.655                    | 514.3273                      | 514.28                       | 0.05 |
| APRPGLLSL  | 76.3     | 43.7    | 923.5596                    | 462.2798                      | 462.30                       | 0.02 |
| RESFSLVQV  | 76.3     | 15.1    | 1064.566                    | 532.7830                      | 532.81                       | 0.03 |
| STDHIPILY  | 80.2     | 52.1    | 1058.544                    | 529.7720                      | 529.77                       | 0.00 |
| IPRSITLVV  | 82.6     | 48.0    | 997.6328                    | 499.3164                      | 499.31                       | 0.01 |
| IPRAALLPL  | 94.6     | 59.6    | 963.6273                    | 482.3137                      | 482.31                       | 0.00 |
| RPTLWAAAL  | 95.6     | 49.3    | 998.5706                    | 499.7853                      | 499.79                       | 0.00 |
| ISVGISLLLL | 101.3    | 65.5    | 1027.668                    | 514.3342                      | 514.31                       | 0.02 |
| IMLEALERV  | 103.0    | 29.1    | 1073.595                    | 537.2975                      | 537.31                       | 0.01 |
| LEVIPRTL   | 104.4    | 50.9    | 1053.659                    | 527.3295                      | 527.33                       | 0.00 |
| GEFIIGRVI  | 107.2    | 46.1    | 1003.586                    | 502.2930                      | 502.29                       | 0.00 |
| REFLFNAI   | 113.8    | 42.4    | 1009.539                    | 505.2696                      | 505.28                       | 0.01 |
| TLSDLRVYL  | 114.7    | 38.5    | 1079.602                    | 540.3010                      | 540.32                       | 0.02 |
| IEIERILSV  | 114.7    | 32.0    | 1071.633                    | 536.3167                      | 536.33                       | 0.02 |
| REMIPFAVV  | 114.7    | 41.8    | 1061.574                    | 531.2869                      | 531.29                       | 0.00 |
| LLMVLSPL   | 122.2    | 56.7    | 1041.641                    | 521.3207                      | 521.34                       | 0.02 |
| PSRDSLPLPV | 123.1    | 39.1    | 1080.597                    | 540.7986                      | 540.84                       | 0.04 |
| VLIPKLPQL  | 124.3    | 61.9    | 1020.674                    | 510.8369                      | 510.84                       | 0.00 |
| GPRAVFVLL  | 125.5    | 49.9    | 971.5961                    | 486.2981                      | 486.28                       | 0.02 |
| LSLENLEKI  | 127.6    | 24.8    | 1058.602                    | 529.8008                      | 529.82                       | 0.02 |
| VMLDVPIRL  | 129.5    | 52.7    | 1055.621                    | 528.3103                      | 528.30                       | 0.01 |
| AEFIKFTVI  | 129.6    | 51.9    | 1067.606                    | 534.3030                      | 534.31                       | 0.01 |
| APRTLVL    | 130.8    | 44.7    | 995.6535                    | 498.3268                      | 498.34                       | 0.01 |
| RESFPMILV  | 134.6    | 44.9    | 1091.584                    | 546.2922                      | 546.31                       | 0.02 |
| RLLEVPMML  | 135.8    | 46.2    | 1069.636                    | 535.3182                      | 535.35                       | 0.03 |
| RLLDVLAPL  | 138.1    | 50.4    | 1009.633                    | 505.3164                      | 505.34                       | 0.02 |

# 1st example, TLSDLRVYL

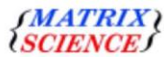

HOME: MASCOT: HELP

Search

Go

Mascot > Sequence Query

## MASCOT Sequence Query

|                            |                                                                                                                               |                               |                                                                                                                               |
|----------------------------|-------------------------------------------------------------------------------------------------------------------------------|-------------------------------|-------------------------------------------------------------------------------------------------------------------------------|
| <b>Your name</b>           | <input type="text"/>                                                                                                          | <b>Email</b>                  | <input type="text"/>                                                                                                          |
| <b>Search title</b>        | <input type="text"/>                                                                                                          |                               |                                                                                                                               |
| <b>Database</b>            | IPI_human                                                                                                                     |                               |                                                                                                                               |
| <b>Taxonomy</b>            | All entries                                                                                                                   |                               |                                                                                                                               |
| <b>Enzyme</b>              | None                                                                                                                          | <b>Allow up to</b>            | 1 missed cleavages                                                                                                            |
| <b>Fixed modifications</b> | <input type="text" value="56-FAM (C-term)"/><br>Acetyl (K)<br>Acetyl (N-term)<br>Acetyl (Protein N-term)<br>Amidated (C-term) | <b>Variable modifications</b> | <input type="text" value="56-FAM (C-term)"/><br>Acetyl (K)<br>Acetyl (N-term)<br>Acetyl (Protein N-term)<br>Amidated (C-term) |
| <b>Quantitation</b>        | None                                                                                                                          |                               |                                                                                                                               |
| <b>Peptide tol. ±</b>      | 0.2                                                                                                                           | Da                            | <b>MS/MS tol. ±</b> 0.2 Da                                                                                                    |
| <b>Peptide charge</b>      | 1+                                                                                                                            | <b>Monoisotopic</b>           | <input checked="" type="radio"/> Average <input type="radio"/>                                                                |
| <b>Query</b>               | <input type="text" value="1079.64 seq(n-TLSDL)"/>                                                                             |                               |                                                                                                                               |
| <b>Instrument</b>          | ESI-QUAD-TOF                                                                                                                  |                               |                                                                                                                               |
| <b>Decoy</b>               | <input type="checkbox"/>                                                                                                      | <b>Report top</b>             | 20 hits                                                                                                                       |
| <b>Start Search ...</b>    |                                                                                                                               | <b>Reset Form</b>             |                                                                                                                               |

# Mascot Search Results

User :  
 Email :  
 Search title :  
 Database : IPI\_human (86635 sequences; 35084983 residues)  
 Timestamp : 3 Mar 2011 at 12:06:45 GMT  
 Top Score : 59 for **IPI00168554**, Tax\_Id=9606 Gene\_Symbol=SRXN1 Sulfiredoxin-1

## Probability Based Mowse Score

Protein score is  $-10 \cdot \log(P)$ , where P is the probability that the observed match is a random event. Protein scores greater than 62 are significant ( $p < 0.05$ ).

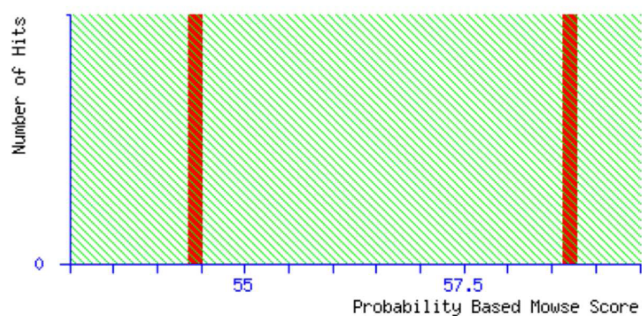

## Protein Summary Report

Format As

[Help](#)

Significance threshold  $p < 0.05$

Max. number of hits 20

## Index

|    | Accession                   | Mass  | Score | Description                                  |
|----|-----------------------------|-------|-------|----------------------------------------------|
| 1. | <a href="#">IPI00168554</a> | 14250 | 59    | Tax_Id=9606 Gene_Symbol=SRXN1 Sulfiredoxin-1 |
| 2. | <a href="#">IPI00646354</a> | 39902 | 54    | Tax_Id=9606 Gene_Symbol=PTAR1 40 kDa protein |

## Results List

|                                              |                             |                 |                 |              |                                    |
|----------------------------------------------|-----------------------------|-----------------|-----------------|--------------|------------------------------------|
| 1.                                           | <a href="#">IPI00168554</a> | Mass: 14250     | Score: 59       | Expect: 0.12 | Queries matched: 1                 |
| Tax_Id=9606 Gene_Symbol=SRXN1 Sulfiredoxin-1 |                             |                 |                 |              |                                    |
|                                              | <b>Observed</b>             | <b>Mr(expt)</b> | <b>Mr(calc)</b> | <b>Delta</b> | <b>Start End Miss Ions Peptide</b> |
|                                              | 1079.6400                   | 1078.6327       | 1078.6022       | 0.0305       | 121 - 129 0 --- S.TLSDLRVYL.G      |
| 2.                                           | <a href="#">IPI00646354</a> | Mass: 39902     | Score: 54       | Expect: 0.31 | Queries matched: 1                 |
| Tax_Id=9606 Gene_Symbol=PTAR1 40 kDa protein |                             |                 |                 |              |                                    |
|                                              | <b>Observed</b>             | <b>Mr(expt)</b> | <b>Mr(calc)</b> | <b>Delta</b> | <b>Start End Miss Ions Peptide</b> |
|                                              | 1079.6400                   | 1078.6327       | 1078.6022       | 0.0305       | 267 - 276 0 --- G.TLSDLHLIPA.G     |

## 2<sup>nd</sup> example, STDHIPILY

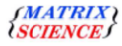

Mascot > Sequence Query

HOME: MASCOT:HELP

Search

Go

### MASCOT Sequence Query

|                                                 |                                                                                                                                                           |                                           |                                                                                                                                                           |
|-------------------------------------------------|-----------------------------------------------------------------------------------------------------------------------------------------------------------|-------------------------------------------|-----------------------------------------------------------------------------------------------------------------------------------------------------------|
| Your name                                       | <input type="text"/>                                                                                                                                      | Email                                     | <input type="text"/>                                                                                                                                      |
| Search title                                    | <input type="text"/>                                                                                                                                      |                                           |                                                                                                                                                           |
| Database                                        | <input type="text" value="IPI_human"/>                                                                                                                    |                                           |                                                                                                                                                           |
| Taxonomy                                        | <input type="text" value="All entries"/>                                                                                                                  |                                           |                                                                                                                                                           |
| Enzyme                                          | <input type="text" value="None"/>                                                                                                                         | Allow up to                               | <input type="text" value="1"/> missed cleavages                                                                                                           |
| Fixed modifications                             | <input type="text" value="56-FAM (C-term)&lt;br/&gt;Acetyl (K)&lt;br/&gt;Acetyl (N-term)&lt;br/&gt;Acetyl (Protein N-term)&lt;br/&gt;Amidated (C-term)"/> | Variable modifications                    | <input type="text" value="56-FAM (C-term)&lt;br/&gt;Acetyl (K)&lt;br/&gt;Acetyl (N-term)&lt;br/&gt;Acetyl (Protein N-term)&lt;br/&gt;Amidated (C-term)"/> |
| Quantitation                                    | <input type="text" value="None"/>                                                                                                                         |                                           |                                                                                                                                                           |
| Peptide tol. ±                                  | <input type="text" value="0.2"/> Da                                                                                                                       | MS/MS tol. ±                              | <input type="text" value="0.2"/> Da                                                                                                                       |
| Peptide charge                                  | <input type="text" value="1+"/>                                                                                                                           | Monoisotopic                              | <input checked="" type="radio"/> Average <input type="radio"/>                                                                                            |
| Query                                           | <input type="text" value="1058.54 seq(c-[il]p[il][il]y)"/>                                                                                                |                                           |                                                                                                                                                           |
| Instrument                                      | <input type="text" value="ESI-QUAD-TOF"/>                                                                                                                 |                                           |                                                                                                                                                           |
| Decoy                                           | <input type="checkbox"/>                                                                                                                                  | Report top                                | <input type="text" value="20"/> hits                                                                                                                      |
| <input type="button" value="Start Search ..."/> |                                                                                                                                                           | <input type="button" value="Reset Form"/> |                                                                                                                                                           |

**MASCOT** (SCIENCE) Mascot Search Results

User :  
 Email :  
 Search title :  
 Database : IPI\_human (86635 sequences; 35084983 residues)  
 Timestamp : 3 Mar 2011 at 12:11:21 GMT  
 Top Score : 47 for [IPI00299506](#), Tax\_Id=9606 Gene\_Symbol=GFPT1 Isoform 2 of Glucosamine--fructose-6-phosphate aminotra

**Probability Based Mowse Score**

Protein score is  $-10 \cdot \log(P)$ , where P is the probability that the observed match is a random event.  
 Protein scores greater than 62 are significant ( $p < 0.05$ ).

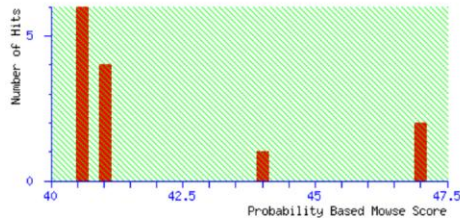

**Protein Summary Report**

Format As  [Help](#)

Significance threshold  $p < 0.05$  Max. number of hits 20

**Index**

| Accession                       | Mass   | Score | Description                                                                                  |
|---------------------------------|--------|-------|----------------------------------------------------------------------------------------------|
| 1. <a href="#">IPI00299506</a>  | 76710  | 47    | Tax_Id=9606 Gene_Symbol=GFPT1 Isoform 2 of Glucosamine--fructose-6-phosphate aminotransfera: |
| 2. <a href="#">IPI00217952</a>  | 78756  | 47    | Tax_Id=9606 Gene_Symbol=GFPT1 Isoform 1 of Glucosamine--fructose-6-phosphate aminotransfera: |
| 3. <a href="#">IPI00953492</a>  | 135891 | 44    | Tax_Id=9606 Gene_Symbol=BAT2L2 Protein                                                       |
| 4. <a href="#">IPI00902970</a>  | 291012 | 41    | Tax_Id=9606 Gene_Symbol=BAT2L2 Isoform 2 of Protein BAT2-like 2                              |
| 5. <a href="#">IPI00941970</a>  | 295881 | 41    | Tax_Id=9606 Gene_Symbol=BAT2L2 Isoform 3 of Protein BAT2-like 2                              |
| 6. <a href="#">IPI00946618</a>  | 301398 | 41    | Tax_Id=9606 Gene_Symbol=BAT2L2 Uncharacterized protein                                       |
| 7. <a href="#">IPI00148247</a>  | 301495 | 41    | Tax_Id=9606 Gene_Symbol=BAT2L2 Isoform 6 of Protein BAT2-like 2                              |
| 8. <a href="#">IPI00902809</a>  | 312542 | 41    | Tax_Id=9606 Gene_Symbol=BAT2L2 Isoform 5 of Protein BAT2-like 2                              |
| 9. <a href="#">IPI00941219</a>  | 312516 | 41    | Tax_Id=9606 Gene_Symbol=BAT2L2 cDNA FLJ52084, highly similar to Homo sapiens BAT2 domain coi |
| 10. <a href="#">IPI00852708</a> | 316718 | 41    | Tax_Id=9606 Gene_Symbol=BAT2L2 Isoform 4 of Protein BAT2-like 2                              |
| 11. <a href="#">IPI00902898</a> | 316815 | 41    | Tax_Id=9606 Gene_Symbol=BAT2L2 Isoform 1 of Protein BAT2-like 2                              |
| 12. <a href="#">IPI00739117</a> | 316888 | 41    | Tax_Id=9606 Gene_Symbol=BAT2L2 317 kDa protein                                               |
| 13. <a href="#">IPI00083708</a> | 316985 | 41    | Tax_Id=9606 Gene_Symbol=BAT2L2 Isoform 7 of Protein BAT2-like 2                              |

**Results List**

|    |                                                                                                               |              |           |             |                                  |
|----|---------------------------------------------------------------------------------------------------------------|--------------|-----------|-------------|----------------------------------|
| 1. | <a href="#">IPI00299506</a>                                                                                   | Mass: 76710  | Score: 47 | Expect: 1.7 | Queries matched: 1               |
|    | Tax_Id=9606 Gene_Symbol=GFPT1 Isoform 2 of Glucosamine--fructose-6-phosphate aminotransferase [isomerizing] 1 |              |           |             |                                  |
|    | Observed                                                                                                      | Mr(expt)     | Mr(calc)  | Delta       | Start End Miss Ions Peptide      |
|    | 1058.5400                                                                                                     | 1057.5327    | 1057.5444 | -0.0117     | 218 - 226 0 --- L.STDHIPIPLY.R   |
| 2. | <a href="#">IPI00217952</a>                                                                                   | Mass: 78756  | Score: 47 | Expect: 1.8 | Queries matched: 1               |
|    | Tax_Id=9606 Gene_Symbol=GFPT1 Isoform 1 of Glucosamine--fructose-6-phosphate aminotransferase [isomerizing] 1 |              |           |             |                                  |
|    | Observed                                                                                                      | Mr(expt)     | Mr(calc)  | Delta       | Start End Miss Ions Peptide      |
|    | 1058.5400                                                                                                     | 1057.5327    | 1057.5444 | -0.0117     | 218 - 226 0 --- L.STDHIPIPLY.R   |
| 3. | <a href="#">IPI00953492</a>                                                                                   | Mass: 135891 | Score: 44 | Expect: 3.4 | Queries matched: 1               |
|    | Tax_Id=9606 Gene_Symbol=BAT2L2 Protein                                                                        |              |           |             |                                  |
|    | Observed                                                                                                      | Mr(expt)     | Mr(calc)  | Delta       | Start End Miss Ions Peptide      |
|    | 1058.5400                                                                                                     | 1057.5327    | 1057.5808 | -0.0481     | 998 - 1006 0 --- S.NTQPIPIPLY.E  |
| 4. | <a href="#">IPI00902970</a>                                                                                   | Mass: 291012 | Score: 41 | Expect: 6.9 | Queries matched: 1               |
|    | Tax_Id=9606 Gene_Symbol=BAT2L2 Isoform 2 of Protein BAT2-like 2                                               |              |           |             |                                  |
|    | Observed                                                                                                      | Mr(expt)     | Mr(calc)  | Delta       | Start End Miss Ions Peptide      |
|    | 1058.5400                                                                                                     | 1057.5327    | 1057.5808 | -0.0481     | 2272 - 2280 0 --- S.NTQPIPIPLY.E |
| 5. | <a href="#">IPI00941970</a>                                                                                   | Mass: 295881 | Score: 41 | Expect: 7   | Queries matched: 1               |
|    | Tax_Id=9606 Gene_Symbol=BAT2L2 Isoform 3 of Protein BAT2-like 2                                               |              |           |             |                                  |
|    | Observed                                                                                                      | Mr(expt)     | Mr(calc)  | Delta       | Start End Miss Ions Peptide      |
|    | 1058.5400                                                                                                     | 1057.5327    | 1057.5808 | -0.0481     | 2516 - 2524 0 --- S.NTQPIPIPLY.E |

6. [IPI00946618](#) Mass: 301388 Score: 41 Expect: 7 Queries matched: 1  
 Tax\_Id=9606 Gene\_Symbol=BAT2L2 Uncharacterized protein  

| Observed  | Mr(expt)  | Mr(calc)  | Delta   | Start | End    | Miss Ions | Peptide        |
|-----------|-----------|-----------|---------|-------|--------|-----------|----------------|
| 1058.5400 | 1057.5327 | 1057.5808 | -0.0481 | 2450  | - 2458 | 0 ---     | S.NTQPIPIPLY.E |
7. [IPI00148247](#) Mass: 301485 Score: 41 Expect: 7 Queries matched: 1  
 Tax\_Id=9606 Gene\_Symbol=BAT2L2 Isoform 6 of Protein BAT2-like 2  

| Observed  | Mr(expt)  | Mr(calc)  | Delta   | Start | End    | Miss Ions | Peptide        |
|-----------|-----------|-----------|---------|-------|--------|-----------|----------------|
| 1058.5400 | 1057.5327 | 1057.5808 | -0.0481 | 2450  | - 2458 | 0 ---     | S.NTQPIPIPLY.E |
8. [IPI00902809](#) Mass: 312542 Score: 41 Expect: 7.4 Queries matched: 1  
 Tax\_Id=9606 Gene\_Symbol=BAT2L2 Isoform 5 of Protein BAT2-like 2  

| Observed  | Mr(expt)  | Mr(calc)  | Delta   | Start | End    | Miss Ions | Peptide        |
|-----------|-----------|-----------|---------|-------|--------|-----------|----------------|
| 1058.5400 | 1057.5327 | 1057.5808 | -0.0481 | 2468  | - 2476 | 0 ---     | S.NTQPIPIPLY.E |
9. [IPI00941219](#) Mass: 312516 Score: 41 Expect: 7.4 Queries matched: 1  
 Tax\_Id=9606 Gene\_Symbol=BAT2L2 cDNA FLJ52084, highly similar to Homo sapiens BAT2 domain containing 1 (BAT2D1), mRNA  

| Observed  | Mr(expt)  | Mr(calc)  | Delta   | Start | End    | Miss Ions | Peptide        |
|-----------|-----------|-----------|---------|-------|--------|-----------|----------------|
| 1058.5400 | 1057.5327 | 1057.5808 | -0.0481 | 2469  | - 2477 | 0 ---     | S.NTQPIPIPLY.E |
10. [IPI00852708](#) Mass: 316718 Score: 41 Expect: 7.5 Queries matched: 1  
 Tax\_Id=9606 Gene\_Symbol=BAT2L2 Isoform 4 of Protein BAT2-like 2  

| Observed  | Mr(expt)  | Mr(calc)  | Delta   | Start | End    | Miss Ions | Peptide        |
|-----------|-----------|-----------|---------|-------|--------|-----------|----------------|
| 1058.5400 | 1057.5327 | 1057.5808 | -0.0481 | 2515  | - 2523 | 0 ---     | S.NTQPIPIPLY.E |
11. [IPI00902898](#) Mass: 316815 Score: 41 Expect: 7.5 Queries matched: 1  
 Tax\_Id=9606 Gene\_Symbol=BAT2L2 Isoform 1 of Protein BAT2-like 2  

| Observed  | Mr(expt)  | Mr(calc)  | Delta   | Start | End    | Miss Ions | Peptide        |
|-----------|-----------|-----------|---------|-------|--------|-----------|----------------|
| 1058.5400 | 1057.5327 | 1057.5808 | -0.0481 | 2515  | - 2523 | 0 ---     | S.NTQPIPIPLY.E |
12. [IPI00739117](#) Mass: 316888 Score: 41 Expect: 7.5 Queries matched: 1  
 Tax\_Id=9606 Gene\_Symbol=BAT2L2 317 kDa protein  

| Observed  | Mr(expt)  | Mr(calc)  | Delta   | Start | End    | Miss Ions | Peptide        |
|-----------|-----------|-----------|---------|-------|--------|-----------|----------------|
| 1058.5400 | 1057.5327 | 1057.5808 | -0.0481 | 2517  | - 2525 | 0 ---     | S.NTQPIPIPLY.E |
13. [IPI00083708](#) Mass: 316985 Score: 41 Expect: 7.5 Queries matched: 1  
 Tax\_Id=9606 Gene\_Symbol=BAT2L2 Isoform 7 of Protein BAT2-like 2  

| Observed  | Mr(expt)  | Mr(calc)  | Delta   | Start | End    | Miss Ions | Peptide        |
|-----------|-----------|-----------|---------|-------|--------|-----------|----------------|
| 1058.5400 | 1057.5327 | 1057.5808 | -0.0481 | 2517  | - 2525 | 0 ---     | S.NTQPIPIPLY.E |

## Search Parameters

Type of search : Sequence Query  
 Enzyme : None  
 Mass values : Monoisotopic  
 Protein Mass : Unrestricted  
 Peptide Mass Tolerance :  $\pm$  0.2 Da  
 Fragment Mass Tolerance :  $\pm$  0.2 Da  
 Max Missed Cleavages : 1  
 Instrument type : ESI-QUAD-TOF  
 Query1 (1058.5400,1+) : <no title>  
 : seq(C-[IL]P[IL][IL]Y)

**Supplementary Table 1: List of independently defined HLA ligand source proteins, their HLA-restriction and chromosomal localization**

| <b>protein</b>                                                  | <b>previously defined HLA ligands (SYFPEITHI DB)</b>                                     | <b>chromosomal localisation</b> |
|-----------------------------------------------------------------|------------------------------------------------------------------------------------------|---------------------------------|
| Sterol carrier protein 2                                        | negative                                                                                 | 1p32                            |
| Glutamine-fructose-6-phosphate transaminase 1                   | HLA-A*01 [72], HLA-A*2601; HLA-Cw*0402 [73]                                              | 2p13                            |
| Ribosomal protein SA                                            | HLA-A*01                                                                                 | 3p22.2                          |
| Apolipoprotein L, 1                                             | HLA-A*0201 [13], HLA-B*08 [18]                                                           | 22q13.1                         |
| Calcium channel, voltage- dependent, alpha 1E subunit           | negative                                                                                 | 1q25-q31                        |
| Clathrin, heavy chain                                           | HLA-A*01, HLA-A*0201, HLA-B*44 [9], HLA-A*2601                                           | 17q11-qter                      |
| Collagen, type XVIII, alpha 1                                   | HLA-A*0201 [9]                                                                           | 21q22.3                         |
| hypothetical LOC400614                                          | negative                                                                                 | 17q24.2                         |
| Chromosome 2 open reading frame 54                              | negative                                                                                 | 2q37.3                          |
| LSM8 homolog, U6 small nuclear RNA associated                   | negative                                                                                 | 19q13.42                        |
| ORM1-like 3 ( <i>S. cerevisiae</i> )                            | HLA-A*0201 [9], HLA-B*5201 [74]                                                          | 17q12-q21.1                     |
| Phosphatidylinositol glycan anchor biosynthesis, class M        | HLA-B*07 [9]                                                                             | 1q23.2                          |
| RAS protein activator like 2                                    | HLA-A*0201 [9]                                                                           | 1q24                            |
| Small nuclear ribonucleoprotein polypeptide G                   | HLA-A*0201 [9]                                                                           | 2p13.3                          |
| Sulfiredoxin 1                                                  | HLA-A*0201 [9]                                                                           | 20p13                           |
| Major histocompatibility complex, class I, C                    | HLA-DRB1*0404 (DR4Dw14) [75], HLA-DRB1*1302 [76], HLA-B*07 [9, 77], HLA-B*0702           | 6p21.3                          |
| Olfactory receptor, family 13, subfamily F, member 1            | negative                                                                                 | 9q31.1                          |
| Actin, alpha 1, skeletal muscle                                 | HLA-A*1101, HLA-B*45 [9], HLA-B*0702 [78], HLA-B*4402 [52], HLA-DRB1*0404 (DR4Dw14) [79] | 1q42.13-q42.2                   |
| Aldo-keto reductase family 1, member C3                         | HLA-B*07 [9, 25], HLA-B*0702 [24]                                                        | 10p15-p14                       |
| Degenerative spermatocyte homolog 1, lipid desaturase           | negative                                                                                 | 1q42.12                         |
| Eukaryotic translation initiation factor 3, subunit 6 48kDa     | HLA-Cw*0401 [73]                                                                         | 8q22-q23                        |
| G-protein signaling modulator 1 (AGS3-like, <i>C. elegans</i> ) | HLA-B*07 [9]; HLA-A*07 [9], HLA-B*27                                                     | 9q34.3                          |
| Guanine nucleotide binding protein (G protein), gamma 5 subunit | HLA-A*0201 [80], HLA-A*03, HLA-A*07 [9], HLA-B*1516 [53]                                 | 1p22                            |
| HECT domain containing 1                                        | negative                                                                                 | 14q12                           |
| Insulin-like growth factor binding protein 3                    | HLA-B*0707 [9]                                                                           | 7p13-p12                        |
| Major histocompatibility complex, class I, A                    | HLA-DRB1*0701 [81]                                                                       | 6p21.3                          |
| Minichromosome maintenance complex component 7                  | HLA-A*0201 [52]                                                                          | 7q21.3-q22.1                    |
| HtrA serine peptidase 1                                         | HLA-B*07 [9]                                                                             | 10q26.3                         |
| RAN binding protein 9                                           | HLA-A*25 [9], HLA-B*1801[82]                                                             | 6p23                            |
| Transcription factor binding to IGHM enhancer 3                 | negative                                                                                 | Xp11.22                         |
| Widely interspaced zinc finger motifs                           | negative                                                                                 | 19p13.1                         |



|                                                               |                                                          |                     |
|---------------------------------------------------------------|----------------------------------------------------------|---------------------|
| GRB2-binding adaptor protein, transmembrane                   | negative                                                 | 5q11.2              |
| Inositol polyphosphate-5-phosphatase F                        | negative                                                 | 10q26.11-q26.12     |
| Bromodomain containing 4                                      | negative                                                 | 7q11.23             |
| Chaperonin containing TCP1, subunit 3 $\gamma$                | negative                                                 | 19p13.1             |
| Component of oligomeric golgi complex 5                       | HLA-B*1801 [82], HLA-B*1501 (B62) [9], HLA-B*4901 [28]   | 1q23                |
| Eukaryotic translation initiation factor 3, subunit 8, 110kDa | HLA-B*4001 [28], HLA-B*4901 [28]                         | 7q22-q31            |
| GTF2IRD2 beta                                                 | HLA-B*1801 [82], [9], HLA-B*4901 [28]                    | 16p11.2             |
| Heat shock protein 90kDa $\alpha$ , class B member 1          | HLA-A*0201 [9], HLA-B*4901 [28]                          | 6p12                |
| HLA-B associated transcript 3                                 | negative                                                 | 6p21.3              |
| LIM and senescent cell antigen-like domains 2                 | negative                                                 | 2q14.3              |
| Muscle RAS oncogene homolog                                   | negative                                                 | 3q22.3              |
| Myosin IE                                                     | HLA-A*1101, HLA-B*08 [9]; HLA-B*08 [52], HLA-B*4901 [28] | 15q21-q22           |
| Ribonucleotide reductase M2 B (TP53 inducible)                | negative                                                 | 8q23.1              |
| Ribosomal protein L14                                         | HLA-A*25, HLA-B*1501 (B62) [9], HLA-B*4901 [28]          | 3p22-p21.2          |
| Septin 9                                                      | HLA-B*1509 [78], HLA-B*1510 [46], HLA-Cw*0102 [83]       | 17q25               |
| similar to CG14977-PA                                         | negative                                                 | 7q22.1              |
| Ubiquilin 1                                                   | negative                                                 | 9q22   9q21.2-q21.3 |
| Progesterin and adipoQ receptor family member IV              | HLA-A*2601                                               | 16p13.3             |

Table 2 lists the names of the identified source proteins previously defined HLA ligands and their chromosomal localization. The references cited in column 2 were extracted from the SYFPEITHI data base (<http://www.syfpeithi.de/scripts/MHCServer.dll/home.htm>).

**Supplementary Table 2: GO annotation for source proteins defined by the ligandomics approach**

A

|           | GO:0005515 | protein binding | GO:0003824 | catalytic activity | GO:0003676 | nucleotide acid binding | GO:0000166 | nucleotide binding | GO:0046872 | metal ion binding | GO:0005198 | structural molecule activity | GO:0030234 | enzyme regulator activity | GO:0008289 | lipid binding | GO:0004871 | signal transducer activity | GO:0005215 | transporter activity | others |  |  |
|-----------|------------|-----------------|------------|--------------------|------------|-------------------------|------------|--------------------|------------|-------------------|------------|------------------------------|------------|---------------------------|------------|---------------|------------|----------------------------|------------|----------------------|--------|--|--|
| EIF3C     |            |                 |            |                    |            |                         |            |                    |            |                   |            |                              |            |                           |            |               |            |                            |            |                      |        |  |  |
| MYO1E     |            |                 |            |                    |            |                         |            |                    |            |                   |            |                              |            |                           |            |               |            |                            |            |                      |        |  |  |
| SCP2      |            |                 |            |                    |            |                         |            |                    |            |                   |            |                              |            |                           |            |               |            |                            |            |                      |        |  |  |
| RASAL2    |            |                 |            |                    |            |                         |            |                    |            |                   |            |                              |            |                           |            |               |            |                            |            |                      |        |  |  |
| DEGS1     |            |                 |            |                    |            |                         |            |                    |            |                   |            |                              |            |                           |            |               |            |                            |            |                      |        |  |  |
| RPL14     |            |                 |            |                    |            |                         |            |                    |            |                   |            |                              |            |                           |            |               |            |                            |            |                      |        |  |  |
| TFE3      |            |                 |            |                    |            |                         |            |                    |            |                   |            |                              |            |                           |            |               |            |                            |            |                      |        |  |  |
| RPSA      |            |                 |            |                    |            |                         |            |                    |            |                   |            |                              |            |                           |            |               |            |                            |            |                      |        |  |  |
| HSP90AB1  |            |                 |            |                    |            |                         |            |                    |            |                   |            |                              |            |                           |            |               |            |                            |            |                      |        |  |  |
| ACTA1     |            |                 |            |                    |            |                         |            |                    |            |                   |            |                              |            |                           |            |               |            |                            |            |                      |        |  |  |
| IGFBP3    |            |                 |            |                    |            |                         |            |                    |            |                   |            |                              |            |                           |            |               |            |                            |            |                      |        |  |  |
| APOL1     |            |                 |            |                    |            |                         |            |                    |            |                   |            |                              |            |                           |            |               |            |                            |            |                      |        |  |  |
| MCM7      |            |                 |            |                    |            |                         |            |                    |            |                   |            |                              |            |                           |            |               |            |                            |            |                      |        |  |  |
| AKR1C3    |            |                 |            |                    |            |                         |            |                    |            |                   |            |                              |            |                           |            |               |            |                            |            |                      |        |  |  |
| OR13F1    |            |                 |            |                    |            |                         |            |                    |            |                   |            |                              |            |                           |            |               |            |                            |            |                      |        |  |  |
| BRD4      |            |                 |            |                    |            |                         |            |                    |            |                   |            |                              |            |                           |            |               |            |                            |            |                      |        |  |  |
| EIF3E     |            |                 |            |                    |            |                         |            |                    |            |                   |            |                              |            |                           |            |               |            |                            |            |                      |        |  |  |
| LSM8      |            |                 |            |                    |            |                         |            |                    |            |                   |            |                              |            |                           |            |               |            |                            |            |                      |        |  |  |
| RANBP9    |            |                 |            |                    |            |                         |            |                    |            |                   |            |                              |            |                           |            |               |            |                            |            |                      |        |  |  |
| SNRPG     |            |                 |            |                    |            |                         |            |                    |            |                   |            |                              |            |                           |            |               |            |                            |            |                      |        |  |  |
| CCT3      |            |                 |            |                    |            |                         |            |                    |            |                   |            |                              |            |                           |            |               |            |                            |            |                      |        |  |  |
| CLTC      |            |                 |            |                    |            |                         |            |                    |            |                   |            |                              |            |                           |            |               |            |                            |            |                      |        |  |  |
| MRAS      |            |                 |            |                    |            |                         |            |                    |            |                   |            |                              |            |                           |            |               |            |                            |            |                      |        |  |  |
| RRM2B     |            |                 |            |                    |            |                         |            |                    |            |                   |            |                              |            |                           |            |               |            |                            |            |                      |        |  |  |
| GNG5      |            |                 |            |                    |            |                         |            |                    |            |                   |            |                              |            |                           |            |               |            |                            |            |                      |        |  |  |
| PAQR4     |            |                 |            |                    |            |                         |            |                    |            |                   |            |                              |            |                           |            |               |            |                            |            |                      |        |  |  |
| GFPT1     |            |                 |            |                    |            |                         |            |                    |            |                   |            |                              |            |                           |            |               |            |                            |            |                      |        |  |  |
| GTF2IRD2B |            |                 |            |                    |            |                         |            |                    |            |                   |            |                              |            |                           |            |               |            |                            |            |                      |        |  |  |
| COL18A1   |            |                 |            |                    |            |                         |            |                    |            |                   |            |                              |            |                           |            |               |            |                            |            |                      |        |  |  |
| GAPT      |            |                 |            |                    |            |                         |            |                    |            |                   |            |                              |            |                           |            |               |            |                            |            |                      |        |  |  |
| GPSM1     |            |                 |            |                    |            |                         |            |                    |            |                   |            |                              |            |                           |            |               |            |                            |            |                      |        |  |  |
| HECTD1    |            |                 |            |                    |            |                         |            |                    |            |                   |            |                              |            |                           |            |               |            |                            |            |                      |        |  |  |
| HLA-A     |            |                 |            |                    |            |                         |            |                    |            |                   |            |                              |            |                           |            |               |            |                            |            |                      |        |  |  |
| HLA-C     |            |                 |            |                    |            |                         |            |                    |            |                   |            |                              |            |                           |            |               |            |                            |            |                      |        |  |  |
| LIMS2     |            |                 |            |                    |            |                         |            |                    |            |                   |            |                              |            |                           |            |               |            |                            |            |                      |        |  |  |
| UBQLN1    |            |                 |            |                    |            |                         |            |                    |            |                   |            |                              |            |                           |            |               |            |                            |            |                      |        |  |  |
| BAT3      |            |                 |            |                    |            |                         |            |                    |            |                   |            |                              |            |                           |            |               |            |                            |            |                      |        |  |  |
| CACNA1E   |            |                 |            |                    |            |                         |            |                    |            |                   |            |                              |            |                           |            |               |            |                            |            |                      |        |  |  |
| WIZ       |            |                 |            |                    |            |                         |            |                    |            |                   |            |                              |            |                           |            |               |            |                            |            |                      |        |  |  |
| SEPT9     |            |                 |            |                    |            |                         |            |                    |            |                   |            |                              |            |                           |            |               |            |                            |            |                      |        |  |  |
| PIGM      |            |                 |            |                    |            |                         |            |                    |            |                   |            |                              |            |                           |            |               |            |                            |            |                      |        |  |  |
| SRXN1     |            |                 |            |                    |            |                         |            |                    |            |                   |            |                              |            |                           |            |               |            |                            |            |                      |        |  |  |

B

|           | GO:0005737 | cytoplasm | GO:0016020 | membrane | GO:0005634 | nucleus | GO:0005856 | cytoskeleton | GO:0005783 | endoplasmic reticulum | GO:0005615 | extracellular space | GO:0005739 | mitochondrion | others |
|-----------|------------|-----------|------------|----------|------------|---------|------------|--------------|------------|-----------------------|------------|---------------------|------------|---------------|--------|
| RPSA      |            |           |            |          |            |         |            |              |            |                       |            |                     |            |               |        |
| HECTD1    |            |           |            |          |            |         |            |              |            |                       |            |                     |            |               |        |
| HSP90AB1  |            |           |            |          |            |         |            |              |            |                       |            |                     |            |               |        |
| LIMS2     |            |           |            |          |            |         |            |              |            |                       |            |                     |            |               |        |
| UBQLN1    |            |           |            |          |            |         |            |              |            |                       |            |                     |            |               |        |
| RPL14     |            |           |            |          |            |         |            |              |            |                       |            |                     |            |               |        |
| SNRPG     |            |           |            |          |            |         |            |              |            |                       |            |                     |            |               |        |
| WIZ       |            |           |            |          |            |         |            |              |            |                       |            |                     |            |               |        |
| EIF3E     |            |           |            |          |            |         |            |              |            |                       |            |                     |            |               |        |
| ACTA1     |            |           |            |          |            |         |            |              |            |                       |            |                     |            |               |        |
| CCT3      |            |           |            |          |            |         |            |              |            |                       |            |                     |            |               |        |
| SCP2      |            |           |            |          |            |         |            |              |            |                       |            |                     |            |               |        |
| RRM2B     |            |           |            |          |            |         |            |              |            |                       |            |                     |            |               |        |
| AKR1C3    |            |           |            |          |            |         |            |              |            |                       |            |                     |            |               |        |
| BRD4      |            |           |            |          |            |         |            |              |            |                       |            |                     |            |               |        |
| MCM7      |            |           |            |          |            |         |            |              |            |                       |            |                     |            |               |        |
| MRAS      |            |           |            |          |            |         |            |              |            |                       |            |                     |            |               |        |
| DEGS1     |            |           |            |          |            |         |            |              |            |                       |            |                     |            |               |        |
| GPSM1     |            |           |            |          |            |         |            |              |            |                       |            |                     |            |               |        |
| SRXN1     |            |           |            |          |            |         |            |              |            |                       |            |                     |            |               |        |
| APOL1     |            |           |            |          |            |         |            |              |            |                       |            |                     |            |               |        |
| GNG5      |            |           |            |          |            |         |            |              |            |                       |            |                     |            |               |        |
| CACNA1E   |            |           |            |          |            |         |            |              |            |                       |            |                     |            |               |        |
| GTF2IRD2B |            |           |            |          |            |         |            |              |            |                       |            |                     |            |               |        |
| LSM8      |            |           |            |          |            |         |            |              |            |                       |            |                     |            |               |        |
| IGFBP3    |            |           |            |          |            |         |            |              |            |                       |            |                     |            |               |        |
| MYO1E     |            |           |            |          |            |         |            |              |            |                       |            |                     |            |               |        |
| COG5      |            |           |            |          |            |         |            |              |            |                       |            |                     |            |               |        |
| EIF3C     |            |           |            |          |            |         |            |              |            |                       |            |                     |            |               |        |
| GFPT1     |            |           |            |          |            |         |            |              |            |                       |            |                     |            |               |        |
| RANBP9    |            |           |            |          |            |         |            |              |            |                       |            |                     |            |               |        |
| CLTC      |            |           |            |          |            |         |            |              |            |                       |            |                     |            |               |        |
| GAPT      |            |           |            |          |            |         |            |              |            |                       |            |                     |            |               |        |
| HLA-A     |            |           |            |          |            |         |            |              |            |                       |            |                     |            |               |        |
| HLA-C     |            |           |            |          |            |         |            |              |            |                       |            |                     |            |               |        |
| ORMDL3    |            |           |            |          |            |         |            |              |            |                       |            |                     |            |               |        |
| PAQR4     |            |           |            |          |            |         |            |              |            |                       |            |                     |            |               |        |
| BAT3      |            |           |            |          |            |         |            |              |            |                       |            |                     |            |               |        |
| TFE3      |            |           |            |          |            |         |            |              |            |                       |            |                     |            |               |        |
| RASAL2    |            |           |            |          |            |         |            |              |            |                       |            |                     |            |               |        |
| SEPT9     |            |           |            |          |            |         |            |              |            |                       |            |                     |            |               |        |
| COL18A1   |            |           |            |          |            |         |            |              |            |                       |            |                     |            |               |        |
| HTRA1     |            |           |            |          |            |         |            |              |            |                       |            |                     |            |               |        |
| OR13F1    |            |           |            |          |            |         |            |              |            |                       |            |                     |            |               |        |

50 distinct proteins were classified based on GO annotations as outlined in the Experimental Procedures according to (A) their putative function and (B) their subcellular localization. For C2orf54, hypothetical LOC400614, similar to CG14977-PA, COG5, HTRA1, INPP5F, ORMDL3 no functional annotations exist and for C2orf54, hypothetical LOC400614, similar to CG14977-PA, INPP5F, PIGM no subcellular localization are known.

**Supplementary Table 3:** Colored heatmap of those targets which were also identified as members of the ligandome of the cell line MZ3733RC

| Gene symbol | 2733  | 2820  | 2825  | 2826  | 2865  | 2875  |
|-------------|-------|-------|-------|-------|-------|-------|
| ACTA1       | 3.47  | -0.29 | -0.10 | -0.52 | 0.53  |       |
| AKR1C3      | 0.47  |       | 0.69  | 2.41  | 2.64  | -0.03 |
| APOL1       |       | 0.26  | 0.84  | -0.23 | 1.73  | -0.23 |
| BRD4        | 0.48  | -0.77 | -0.28 | -0.02 | -0.12 | -0.34 |
| CCT3        | -1.36 | -0.29 | -0.77 | 1.40  | 0.66  |       |
| CLTC        | 2.83  | 0.96  | 0.51  | 1.87  | -1.75 | -0.51 |
| COL18A1     | -0.81 | 0.84  | 3.58  | 0.80  | -1.97 | 1.92  |
| COG5        | 0.64  | 1.06  | 0.17  | 0.89  | -0.41 | 0.20  |
| DEGS1       | 1.21  | 0.53  | 0.56  | 1.35  | -0.17 | 1.13  |
| HSP90AB1    | -1.24 | 0.72  | 0.04  | 0.74  | 0.22  | 0.72  |
| HECTD1      | -1.26 | -0.23 | 0.80  | 1.31  | -2.20 | -0.29 |
| BAT3        | -0.84 | -0.13 | -0.08 | -0.30 | 0.45  | 0.61  |
| INPP5F      | -0.90 | 0.16  | 0.66  | -0.31 | -1.14 | 0.21  |
| IGFBP3      | 2.43  | 1.44  | 2.71  | 3.16  | 1.99  | 1.22  |
| HLA-A       | 1.01  | 0.57  | 0.57  | 0.14  | 0.11  | 0.58  |
| HLA-C       | -0.19 | 1.34  | 0.53  | 0.06  | 0.26  | 1.78  |
| MCM7        | -0.37 | 0.39  | 0.11  | 2.66  | 0.94  | 1.30  |
| MRAS        | -0.22 | 0.15  | 0.08  | -0.03 | -0.26 | 0.00  |
| MYO1E       | 0.50  | 0.18  | 0.30  | 0.68  | 1.23  | -0.38 |
| PIGM        |       | 0.28  | 0.44  | 0.05  |       | -0.06 |
| RASAL2      | -0.38 | 0.19  | 1.13  | 0.19  | 0.53  | 0.03  |
| RRM2B       | 4.89  |       | 1.14  | 1.06  | 0.28  | 0.11  |
| RPSA        | -0.06 | -0.08 | -0.58 | 0.43  | 1.45  | 0.85  |
| SEPT9       | -0.10 | -0.06 | -0.43 | -0.06 | -0.87 | -0.43 |
| SCP2        | -0.38 | 0.02  | 0.31  | -0.16 | -0.71 | -0.80 |
| TFE3        | -0.33 | 0.29  | 0.45  | -0.11 | 0.60  | 0.20  |
| UBQLN1      |       | -0.44 | -0.39 | -0.79 | 0.00  | -0.35 |
| WIZ         | -1.16 | 0.54  | 0.66  | 0.71  | -0.90 | 0.37  |

  

|    |   |    |
|----|---|----|
| -2 | 0 | +2 |
|----|---|----|

The table lists the gene symbols along with the log fold changes defined in a subset of 6 previously analysed tissue systems comprised of renal cancer vs. tumor adjacent normal renal epithelium [44]. The bottom line defines the color coding of the regulation mode. Data which were not interpretable on the array are marked grey.

**Supplementary Table 4:** Target verification for source proteins of identified HLA class I ligands

| protein                                                            | UniProtKB ID  | gene ID      | Human Protein Atlas                                      |                   | cDNA microarray data      |
|--------------------------------------------------------------------|---------------|--------------|----------------------------------------------------------|-------------------|---------------------------|
|                                                                    |               |              | ab code                                                  | validation score  |                           |
| Sterol carrier protein 2                                           | P22307        | SCP2         | HPA027317<br>HPA027317<br>HPA027317                      | uncertain         | yes                       |
| Glutamine-fructose-6-phosphate transaminase 1                      | Q06210        | GFPT1        | no ab in depository                                      | no scoring        | no probes on array        |
| Ribosomal protein SA                                               | P08865        | RPSA         | CAB009561                                                | uncertain         | yes                       |
| <b>Apolipoprotein L, 1</b>                                         | <b>O14791</b> | <b>APOL1</b> | <b>HPA018885</b>                                         | <b>supportive</b> | <b>yes</b>                |
| Calcium channel, voltage-dependent, alpha 1E subunit               | Q15878        | CACNA1E      | no ab in depository                                      | no scoring        | no probes on array        |
| <b>Clathrin, heavy polypeptide (HC)</b>                            | <b>Q00610</b> | <b>CLTC</b>  | <b>CAB010389</b><br><b>CAB011571</b><br><b>CAB017155</b> | <b>supportive</b> | <b>yes</b>                |
| Collagen, type XVIII, alpha 1                                      | P39060        | COL18A       | CAB001961                                                | uncertain         | yes                       |
| Hypothetical LOC400614                                             |               |              | no ab in depository                                      | no scoring        | no probes on array        |
| Chromosome 2 open reading frame 54 (hypothetical protein FLJ22671) | Q53QU5        | C2orf54      | no ab in depository                                      | no scoring        | no probes on array        |
| <b>Isochorismatase domain containing 2</b>                         | <b>O95777</b> | <b>LSM8</b>  | <b>HPA020116</b>                                         | <b>supportive</b> | <b>no probes on array</b> |
| ORM1-like 3 ( <i>S. cerevisiae</i> )                               | Q8N138        | ORMDL3       | no ab in depository                                      | no scoring        | no probes on array        |
| Phosphatidylinositol glycan, class M                               | Q9H3S5        | PIGM         | no ab in depository                                      | no scoring        | yes                       |
| RAS protein activator like 2                                       | Q9UJF2        | RASAL2       | HPA018805<br>HPA020453                                   | low uncertain     | yes                       |
| Small nuclear ribonucleoprotein polypeptide G                      | P62308        | SNRPG        | no ab in depository                                      | no scoring        | no probes on array        |
| Sulfiredoxin 1 homolog ( <i>S. cerevisiae</i> )                    | Q9BYN0        | SRXN1        | no ab in depository                                      | no scoring        | no probes on array        |
| Major histocompatibility complex, class I, C                       | P10321        | HLA-C        | no ab in depository                                      | no scoring        | yes                       |
| <b>Actin, alpha 1, skeletal muscle</b>                             | <b>P68133</b> | <b>ACTA1</b> | <b>CAB000045</b>                                         | <b>supportive</b> | <b>yes</b>                |

|                                                                                                                |               |               |                                     |                   |                           |
|----------------------------------------------------------------------------------------------------------------|---------------|---------------|-------------------------------------|-------------------|---------------------------|
| Aldo-keto reductase family 1, member C3 (3-alpha hydroxysteroid dehydrogenase, type II)                        | P42330        | AKR1C3        | CAB010874                           | uncertain         | yes                       |
| Degenerative spermatocyte homolog 1, lipid desaturase (Drosophila)                                             | O15121        | DEGS1         | HPA014763                           | uncertain         | yes                       |
| <b>Eukaryotic translation initiation factor 3, subunit 6 48kDa</b>                                             | <b>P60228</b> | <b>EIF3E</b>  | <b>HPA023973</b>                    | <b>supportive</b> | <b>no probes on array</b> |
| G-protein signalling modulator 1 (AGS3-like, C. elegans)                                                       | Q86YR5        | GPSM1         | no ab in depository                 | no scoring        | no probes on array        |
| Guanine nucleotide binding protein (G protein), gamma 5 subunit                                                | P63218        | GNG5          | CAB032623                           | uncertain         | no probes on array        |
| HECT domain containing 1                                                                                       | Q9ULT8        | HECTD1        | HPA002929                           | uncertain         | yes                       |
| Insulin-like growth factor binding protein 3                                                                   | P17936        | IGFBP3        | CAB010360<br>HPA013357              | uncertain         | yes                       |
| Major histocompatibility complex, class I, A                                                                   | P16189        | HLA-A         | no ab in depository                 | no scoring        | yes                       |
| MCM7 minichromosome maintenance deficient 7 (S. cerevisiae)                                                    | P33993        | MCM7          | CAB002163<br>HPA003898<br>CAB016312 | supportive        | yes                       |
| <b>Protease, serine, 11 (IGF binding)</b>                                                                      | <b>Q92743</b> | <b>HTRA1</b>  | <b>HPA036655</b>                    | <b>supportive</b> | <b>no probes on array</b> |
| <b>RAN binding protein 9</b>                                                                                   | <b>Q96S59</b> | <b>RANBP9</b> | <b>CAB033767</b>                    | <b>supportive</b> | <b>no probes on array</b> |
| <b>Transcription factor binding to IGHM enhancer 3</b>                                                         | <b>P19532</b> | <b>TFE3</b>   | <b>HPA023881</b>                    | <b>supportive</b> | <b>yes</b>                |
| Widely-interspaced zinc finger motifs                                                                          | Q96IG5        | WIZ           | HPA022923                           | uncertain         | yes                       |
| Growth factor receptor-bound protein 2-binding adapter protein (protein GAPT; (hypothetical protein FLJ33641)) | Q8N292        | GAPT          | HPA011070                           | uncertain         | no probes on array        |
| Inositol polyphosphate-5-phosphatase F                                                                         | Q5W135        | INPP5F        | no ab in depository                 | no scoring        | yes                       |
| General transcription factor II-I repeat domain-containing protein 2B                                          | Q6EKJ0        | GTF2IRD2      | no ab in depository                 | no scoring        | no probes on array        |
| Bromodomain containing 4                                                                                       | O60885        | BRD4          | HPA015055                           | uncertain         | yes                       |
| Chaperonin containing TCP1, subunit 3 (gamma)                                                                  | P49368        | CCT3          | HPA006543                           | uncertain         | yes                       |

|                                                       |               |               |                     |                   |                    |
|-------------------------------------------------------|---------------|---------------|---------------------|-------------------|--------------------|
| <b>Component of oligomeric Golgi complex 5</b>        | <b>Q9UP83</b> | <b>COG5</b>   | <b>HPA020300</b>    | <b>supportive</b> | <b>yes</b>         |
| Eukaryotic translation initiation factor 3, subunit 8 | Q99613        | EIF3C         | no ab in depository | no scoring        | no probes on array |
| Heat shock 90kDa protein 1, beta                      | P08238        | HSP90AB1      | CAB005230           | uncertain         | yes                |
| <b>HLA-B associated transcript 3</b>                  | <b>P46379</b> | <b>BAT3</b>   | <b>CAB020704</b>    | <b>supportive</b> | <b>yes</b>         |
| LIM and senescent cell antigen-like domains 2         | Q7Z4I7        | LIMS2         | no ab in depository | no scoring        | no probes on array |
| Muscle RAS oncogene homolog                           | O14807        | MRAS          | no ab in depository | no scoring        | yes                |
| Myosin IE                                             | Q12965        | MYO1E         | HPA023886           | uncertain         | yes                |
| Ribonucleotide reductase M2 B (TP53 inducible)        | Q7LG56        | RRM2B         | HPA028812           | supportive        | yes                |
| 60S ribosomal protein L14 (ribosomal protein L14)     | P50914        | RPL14         | HPA004136           | medium supportive | no probes on array |
| Septin 9                                              | Q9UHD8        | SEPT9         | no ab in depository | no scoring        | yes                |
| Similar to CG14977-PA                                 |               |               | no ab in depository | no scoring        | no probes on array |
| <b>Ubiquilin 1</b>                                    | <b>Q9UMX0</b> | <b>UBQLN1</b> | <b>CAB037256</b>    | <b>supportive</b> | <b>yes</b>         |
| Olfactory receptor, F13, member 1                     | Q8NGS4        | OR13F1        | no ab in depository | no scoring        | no probes on array |
| Progesterin and adipoQ receptor family member IV      | Q8N4S7        | PAQR4         | no ab in depository | no scoring        | no probes on array |

Supplementary Table 2 lists the names of the source proteins from the identified HLA ligands along with their UniProtKB ID, gene ID, the antibody code and the IHC validation score extracted from the Human Protein Atlas as well as their representation on the cDNA microarray. The shadings indicate that the respective source proteins were either represented on both the cDNA microarray as well as in the antibody depository of the Human Protein Atlas (dark grey) or only in one of the two next to the

qPCR-verified SRXN1 (light grey). The bold lettering indicates that the respective IHC staining pattern stored in the Human Protein Atlas is supportive. For the remaining source proteins currently no further validation data are available.



## **Supplementary Figure legends**

### **Supplementary Fig. 1**

#### **Schematic diagram of the ligandomics analysis work flow**

Briefly, peptide loaded HLA class I molecules presented on the cell surface of MZ2733RC cells were purified from lysates by immunoprecipitation with the antibody W6/32 followed by protein affinity chromatography. The HLA ligands were eluted by acid treatment and subsequently concentrated by ultrafiltration. The resulting pool of peptides was further fractionated using a microcapillary reverse phase high performance liquid chromatography (HPLC) column online coupled to a Q-TOF mass spectrometer equipped with a micro-ESI source. Peptide sequence analysis was performed manually by running sequence tag searches using Mascot 2.0 software. However, relevant hits were manually assessed and not solely by evaluation of the Mascot score but by applying further selection criteria as outlined in the experimental procedures section.

### **Supplementary Fig. 2**

#### **MS chromatograms of HLA-A, -B and -C ligands eluted from the cell line MZ2733RC.**

Total ion current (A) and one of four MS/MS chromatograms (B) to detect doubly charged ions at  $m/z$  300-550.

### **Supplementary Fig. 3**

#### **Immunohistochemical analysis of normal renal epithelium and renal cancer tissue sections for the expression of HLA-B-associated transcript 3 (BAT3).**

Randomly selected sections of TMA representing normal renal epithelium (left segment) and renal cancer tissue (right segment), all taken from the deposit available via the Human Protein Atlas (HPA, Version 7) were selected to document the immunohistochemical staining with the

HLA-B-associated transcript 3-specific antibody CAB020704

HLA-B-associated transcript 3 shows moderate to strong nuclear and slightly weaker cytoplasmic immunoreactivity in most normal and malignant tissues. Renal cancer tissues frequently show strong cytoplasmic positivity with high intensity.

#### **Supplementary Fig. 4**

#### **Immunohistochemical analysis of normal renal epithelium and renal cancer tissue sections for the expression of minichromosome maintenance complex component 7 (MCM7)**

Randomly selected sections of TMA representing normal renal epithelium (left segment) and renal cancer tissue (right segment), all taken from the deposit available via the Human Protein Atlas (HPA, Version 7) were selected to document the immunohistochemical staining pattern of the minichromosome maintenance complex component 7-specific Ab (CAB016312).

Minichromosome maintenance complex component 7 is not expressed in glomeruli and only rarely at moderate levels in tubules showing nuclear localization. In contrast renal cancer tissues show both a higher frequency and higher staining intensity of MCM7 positive cells.

Supplementary Fig. 1

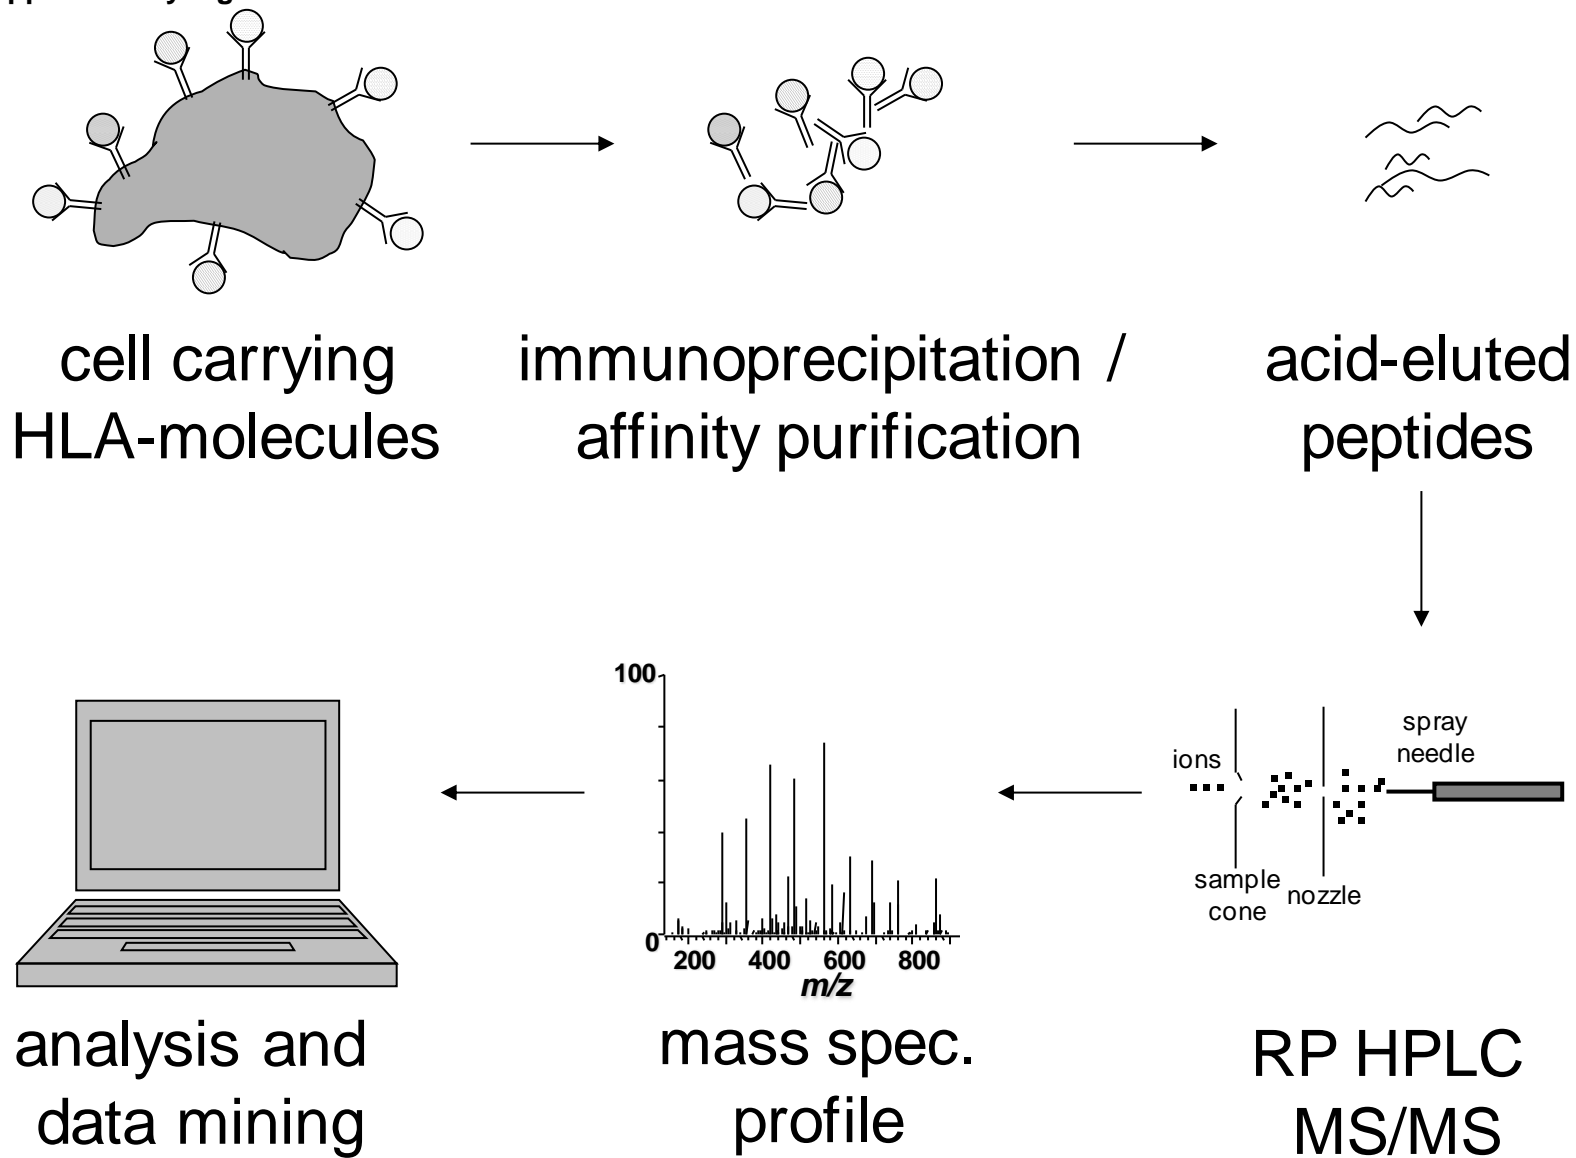

Supplementary Fig. 2

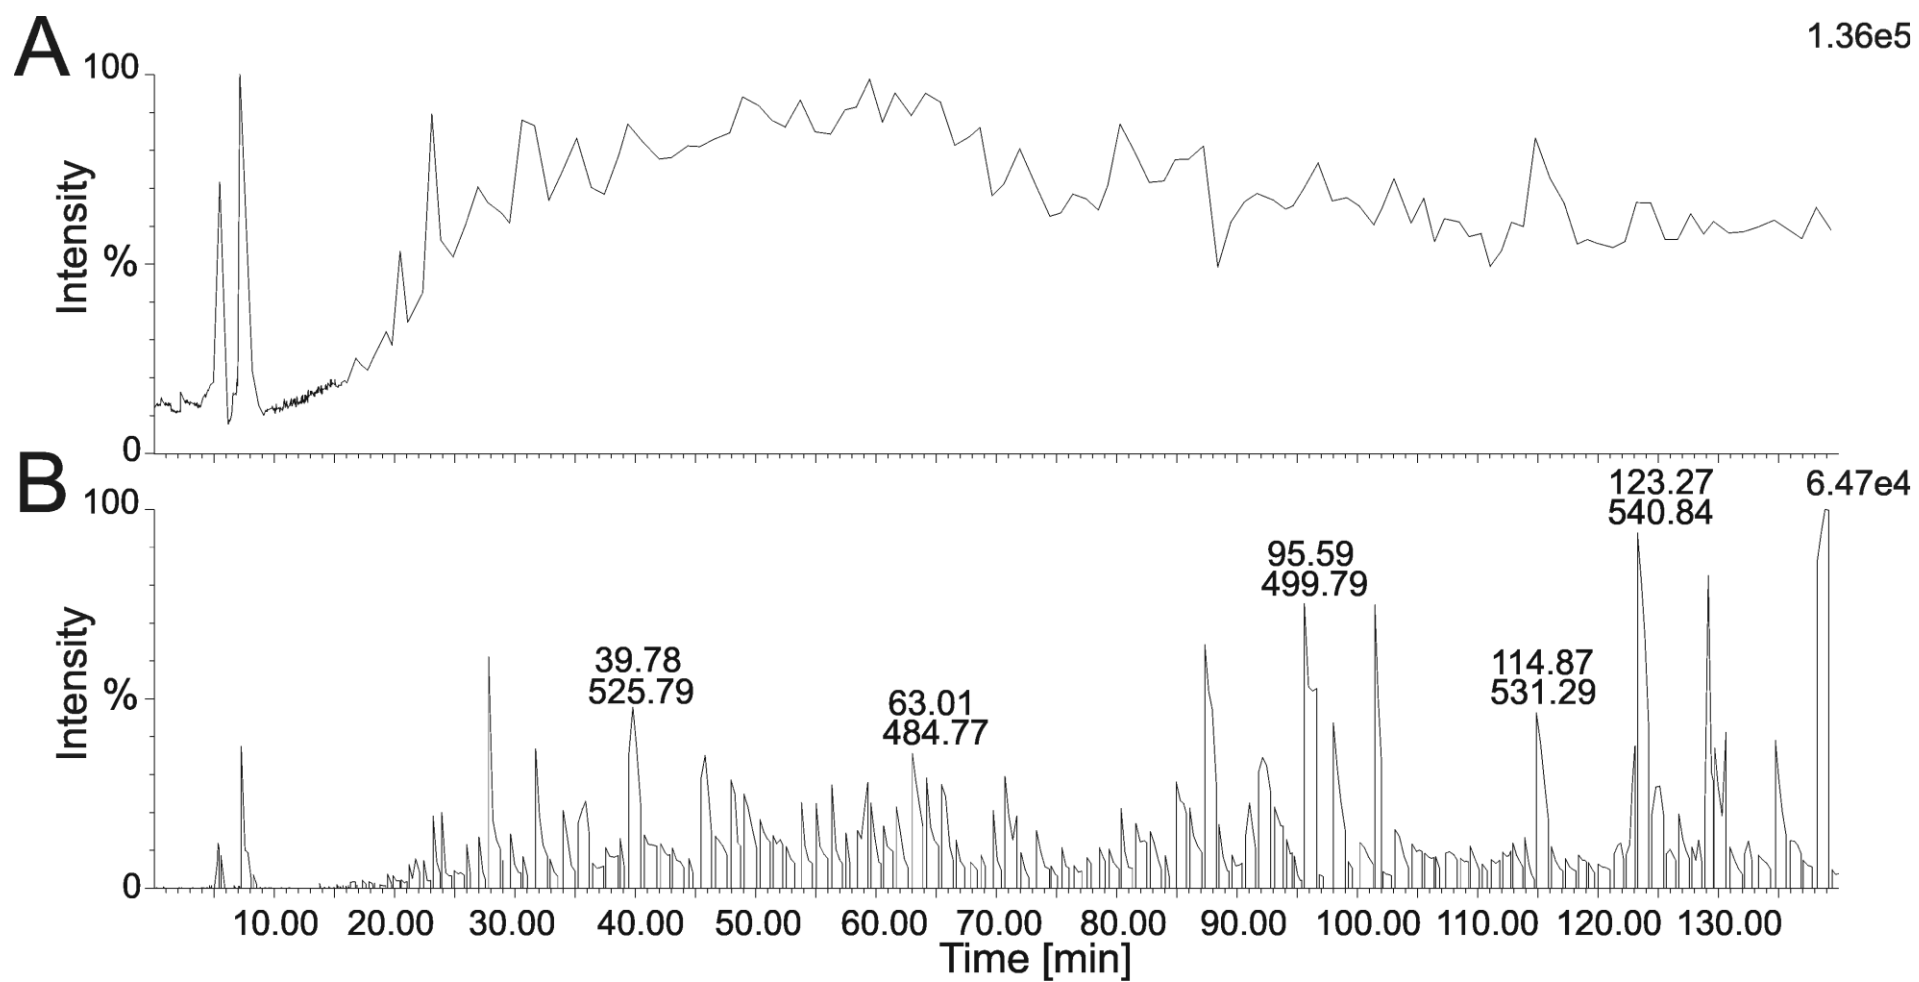

Supplementary Fig. 3

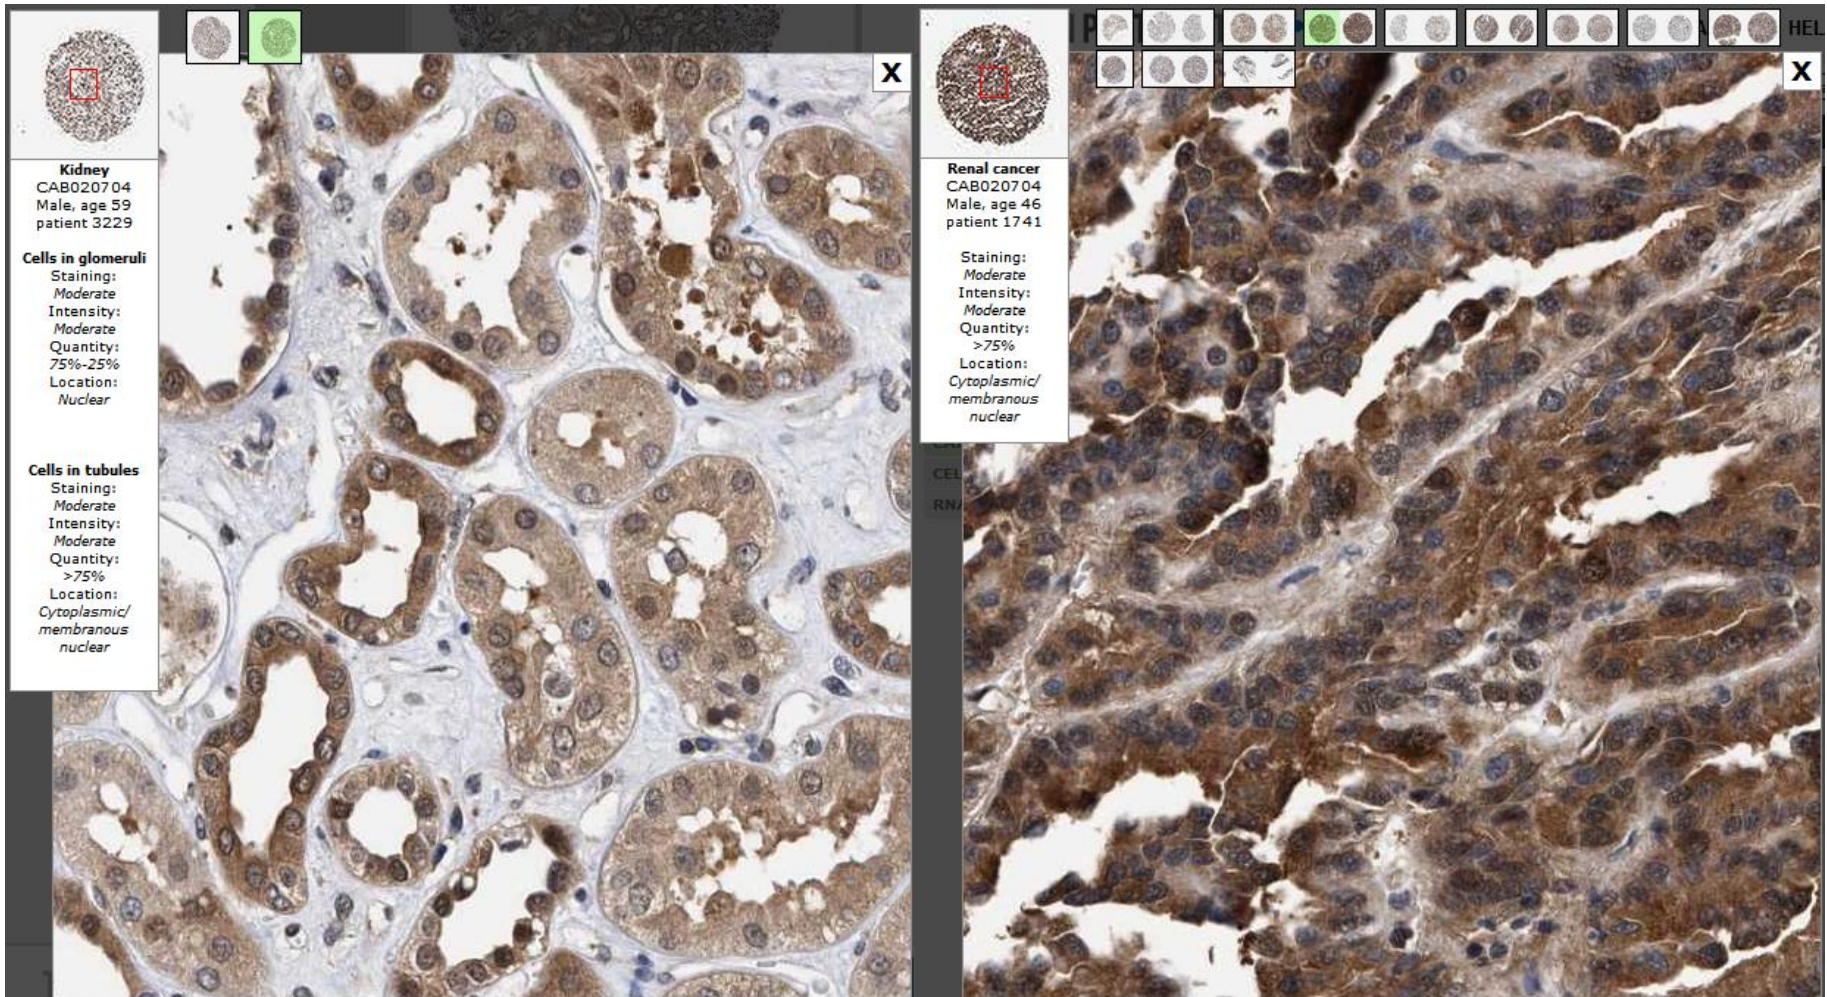



Supplementary Fig. 4

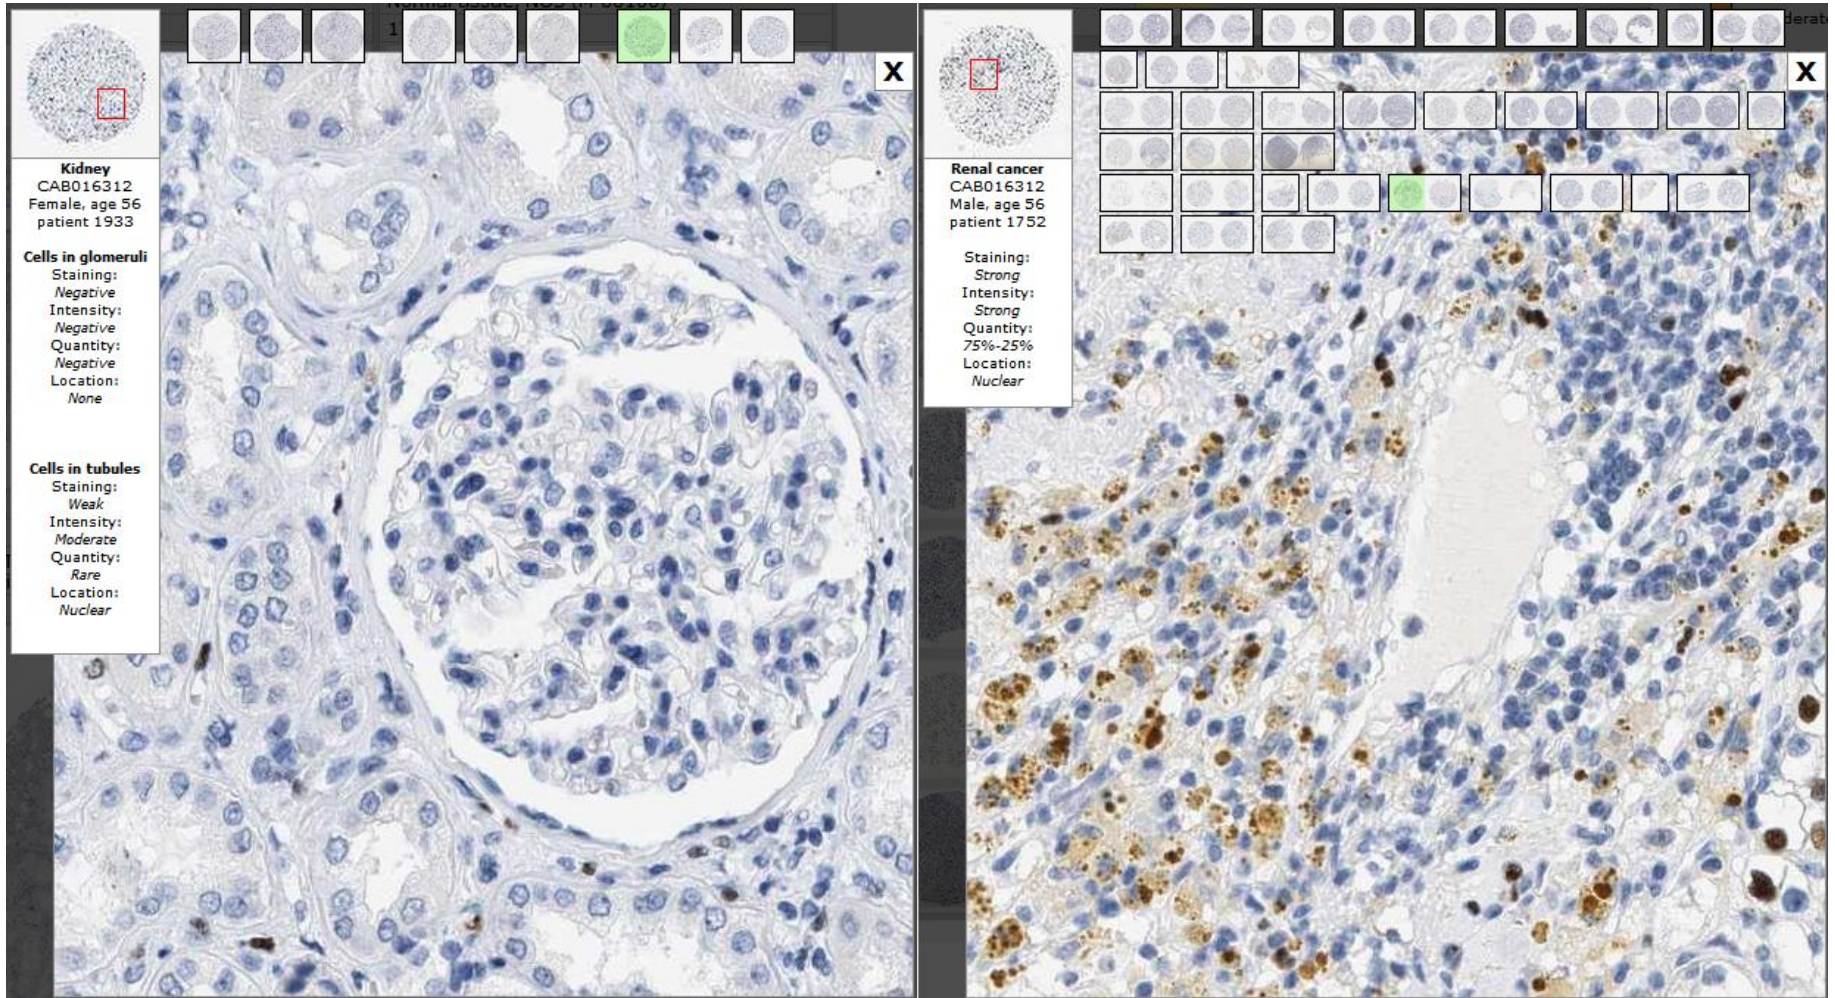

Supplement: NIHMS421463-supplement-supporting_information.pdf [file NIHMS421463-supplement-supporting_information.pdf]
